# Supplementary material for: Dynamic control of gene regulatory logic by seemingly redundant transcription factors
Source: eLife journal article supplement (doi:10.7554/elife.18458), 2016-09-30
Supplement: supp [file elife-18458-supp-v1.zip]

Archive with 21 entries (21 files):
- elife_poa_e18458_Figure_3A_Source_Data_File.csv
- elife_poa_e18458_Figure_1_figure_supplement_1.pdf
- elife_poa_e18458_Figure_5B_Source_Data_File.csv
- elife_poa_e18458_Figure_2_figure_supplement_1.pdf
- elife_poa_e18458_Figure_3_figure_supplement_5.pdf
- elife_poa_e18458_Figure_4B_Source_Data_File.csv
- elife_poa_e18458_Figure_3B_Source_Data_File.csv
- elife_poa_e18458_Figure_3_figure_supplement_2.pdf
- elife_poa_e18458_Figure_3_figure_supplement_1.pdf
- elife_poa_e18458_Figure_1_figure_supplement_2.pdf
- elife_poa_e18458_Figure_5A_Source_Data_File.csv
- elife_poa_e18458_Figure_4_figure_supplement_2.pdf
- elife_poa_e18458_Figure_3_figure_supplement_4.pdf
- elife_poa_e18458_Figure_5D_Source_Data_File.csv
- elife_poa_e18458_Figure_5C_Source_Data_File.csv
- elife_poa_e18458_Figure_4_figure_supplement_1.pdf
- elife_poa_e18458_Figure_2_figure_supplement_2.pdf
- elife_poa_e18458_Figure_4A_Source_Data_File.csv
- elife_poa_e18458_Figure_3_figure_supplement_6.pdf
- elife_poa_e18458_Figure_3_figure_supplement_3.pdf
- elife_poa_e18458_Figure_6_figure_supplement_1.pdf
