# Supplementary material for: Dynamic control of gene regulatory logic by seemingly redundant transcription factors
Source: eLife journal article supplement (doi:10.7554/elife.18458), 2016-09-30
Supplement: supp [file elife-18458-supp-v1.zip › elife_poa_e18458_Figure_1_figure_supplement_1.pdf]

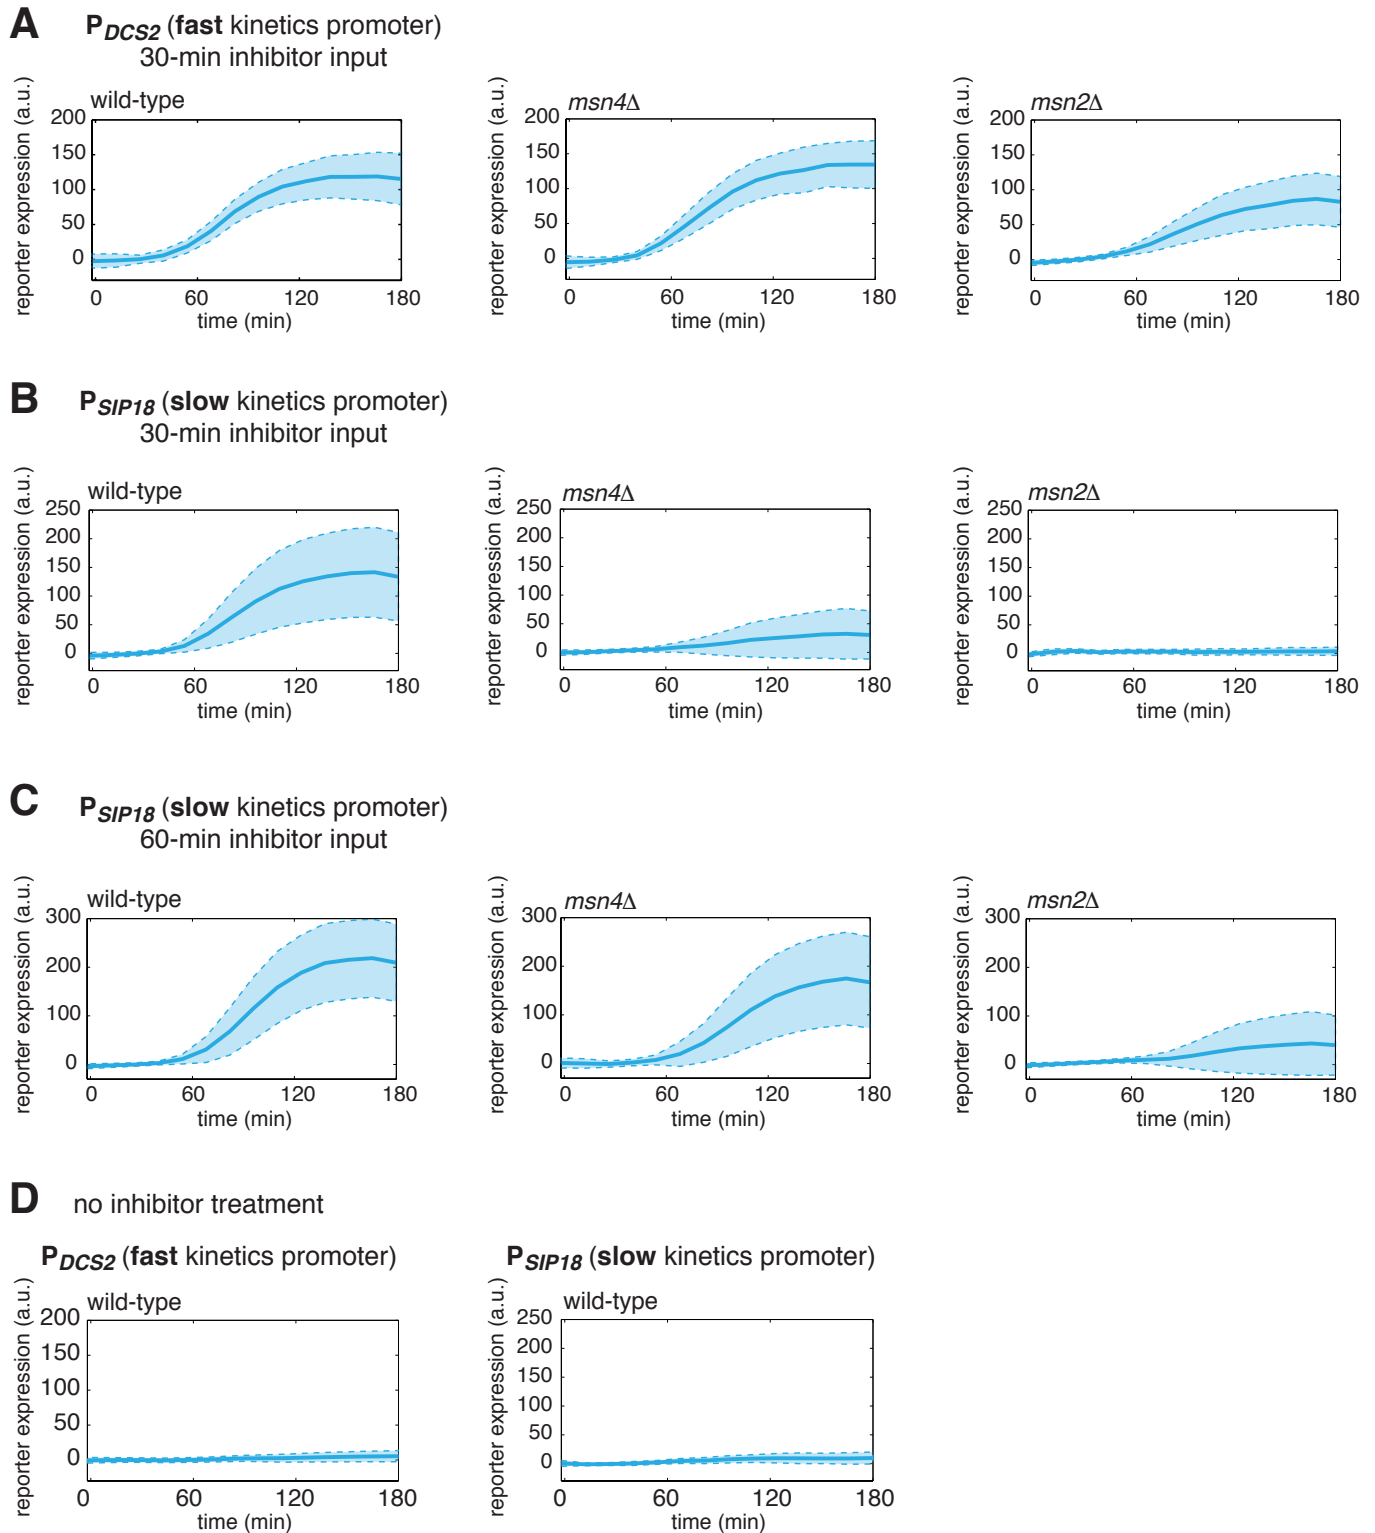

**Figure 1 – figure supplement 1. Dynamic profiles of reporter gene expression.** Averaged single-cell time traces of reporter gene expression under (A) the fast kinetics promoter  $P_{DCS2}$  and (B) the slow kinetics promoter  $P_{SIP18}$ , in response to 30-min inhibitor inputs, (C) the slow kinetics promoter  $P_{SIP18}$ , in response to 60-min inhibitor inputs, and (D) under no inhibitor condition. The single-cell data are the same data used to generate Figure 1, B and C. The solid curves represent the averaged single-cell time traces; the shaded regions represent the standard deviations of single cell responses. For each condition, single-cell responses have been measured over a 3-hour period, which is sufficient for the fluorescent gene expression reporter to reach the plateau in most cells.
