# Supplementary material for: Dynamic control of gene regulatory logic by seemingly redundant transcription factors
Source: eLife journal article supplement (doi:10.7554/elife.18458), 2016-09-30
Supplement: supp [file elife-18458-supp-v1.zip › elife_poa_e18458_Figure_1_figure_supplement_2.pdf]

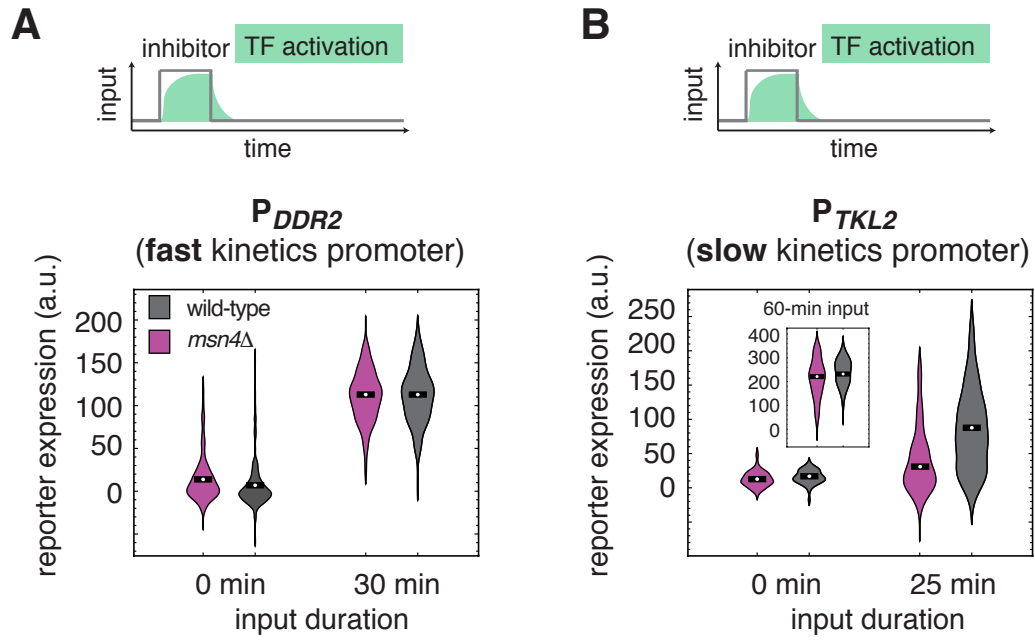

**Figure 1 – figure supplement 2. The dependence on Msn4 might expand generally to slow kinetics promoters.** Violin plots showing the distributions of reporter expression under (A) the fast kinetics promoter  $P_{DDR2}$  and (B) the slow kinetics promoter  $P_{TKL2}$ , respectively. In (B), the inset shows the distributions of  $P_{TKL2}$  reporter expression in response to 60 min pulse of inhibitor input.
