# Supplementary material for: Dynamic control of gene regulatory logic by seemingly redundant transcription factors
Source: eLife journal article supplement (doi:10.7554/elife.18458), 2016-09-30
Supplement: supp [file elife-18458-supp-v1.zip › elife_poa_e18458_Figure_3_figure_supplement_1.pdf]

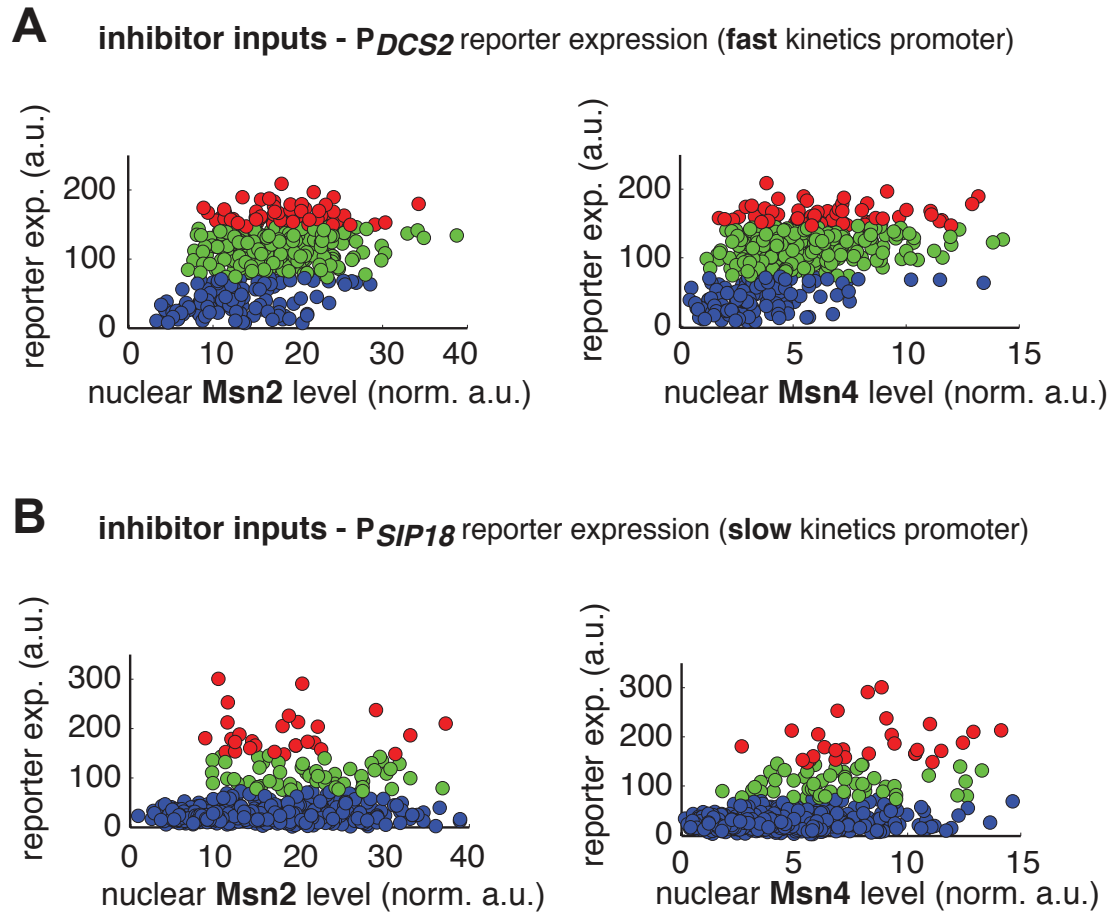

**Figure 3 – figure supplement 1. Single-cell distributions of reporter gene expression versus nuclear TF levels in response to 30-min inhibitor inputs. (A)** Single-cell scatter plots showing the relationships between  $P_{DCS2}$  reporter expression with (left) Msn2 or (right) Msn4 nuclear level, respectively. Single-cell data are from Figure 3A. **(B)** Single-cell scatter plots showing the relationships between  $P_{SIP18}$  reporter expression with (left) Msn2 or (right) Msn4 nuclear level, respectively. Single-cell data are from Figure 3B.
