# Supplementary material for: Dynamic control of gene regulatory logic by seemingly redundant transcription factors
Source: eLife journal article supplement (doi:10.7554/elife.18458), 2016-09-30
Supplement: supp [file elife-18458-supp-v1.zip › elife_poa_e18458_Figure_3_figure_supplement_2.pdf]

**A** inhibitor inputs -  $P_{DCS2}$  reporter expression (**fast** kinetics promoter)

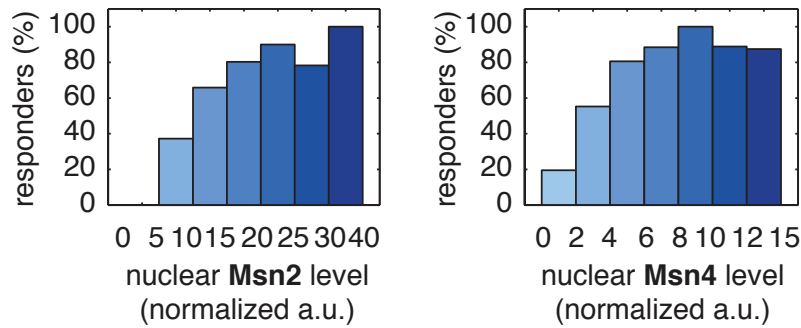

**B** inhibitor inputs -  $P_{SIP18}$  reporter expression (**slow** kinetics promoter)

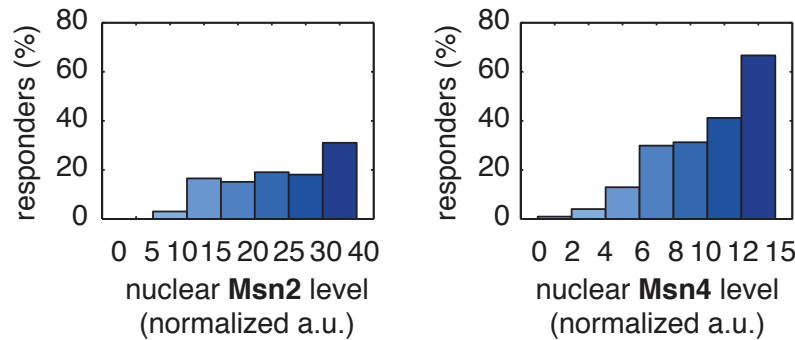

**Figure 3 – figure supplement 2. The relationship between the probability of reporter gene expression and nuclear TF levels in response to 30-min inhibitor inputs. (A)** Bar graphs showing the relationships between the probability of  $P_{DCS2}$  reporter expression with (left) Msn2 or (right) Msn4 nuclear level, respectively. Single-cell data are from Figure 3A. Single cells are binned based on their Msn2 or Msn4 nuclear level as indicated in the x-axis and the proportion of “responder” cells (green and red cells in Fig. 3), instead of the average of reporter expression, is calculated for each binned groups of single cells and shown in the bar graphs. **(B)** Bar graphs showing the relationships between the probability of  $P_{SIP18}$  reporter expression with (left) Msn2 or (right) Msn4 nuclear level, respectively. Single-cell data are from Figure 3B.
