# Supplementary material for: Dynamic control of gene regulatory logic by seemingly redundant transcription factors
Source: eLife journal article supplement (doi:10.7554/elife.18458), 2016-09-30
Supplement: supp [file elife-18458-supp-v1.zip › elife_poa_e18458_Figure_3_figure_supplement_3.pdf]

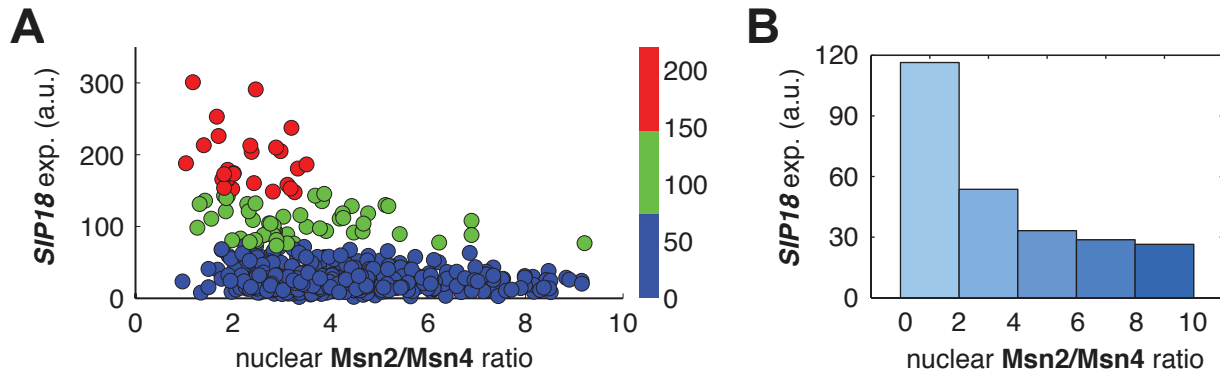

**Figure 3 – figure supplement 3. Relationship between  $P_{SIP18}$  reporter gene expression and the ratio of nuclear Msn2 versus Msn4 in response to 30-min inhibitor inputs.** (A) Scatter plot showing the single-cell distribution of  $P_{SIP18}$  reporter expression with the ratio of nuclear Msn2 versus Msn4. Single-cell data are from Figure 3B. (B) Bar graph shows the relationship between  $P_{SIP18}$  reporter expression and the ratio of nuclear Msn2 versus Msn4. Single cells are binned based on their ratio of nuclear Msn2 versus Msn4 as indicated in the x-axis and the average of reporter expression is calculated for each binned groups of single cells and shown in the bar graphs.
