# Supplementary material for: Dynamic control of gene regulatory logic by seemingly redundant transcription factors
Source: eLife journal article supplement (doi:10.7554/elife.18458), 2016-09-30
Supplement: supp [file elife-18458-supp-v1.zip › elife_poa_e18458_Figure_3_figure_supplement_4.pdf]

## A 60-min inhibitor inputs

(i)

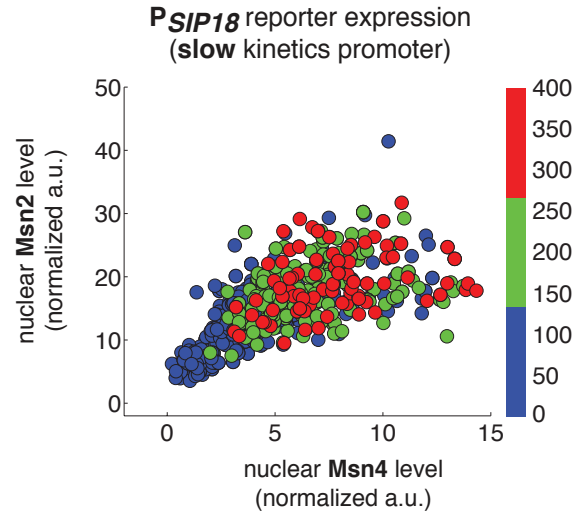

(ii)

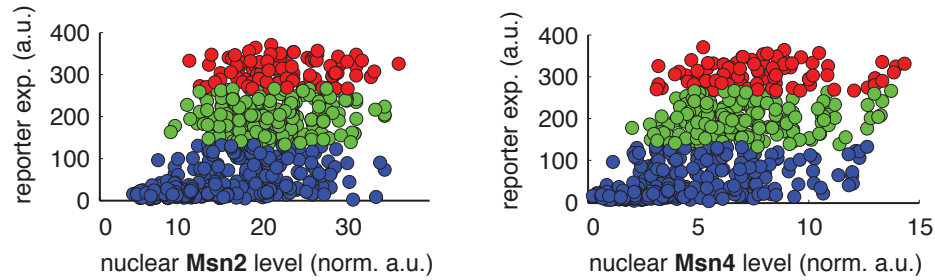

## B

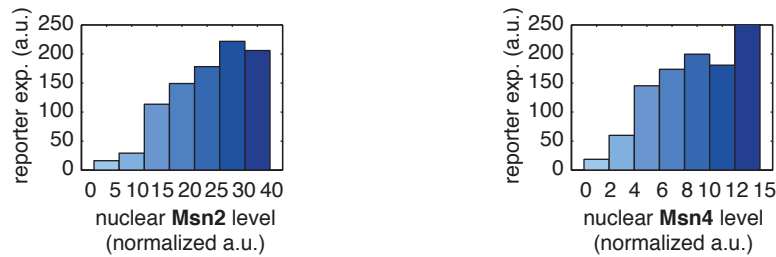

**Figure 3 – figure supplement 4. Msn2 and Msn4 exhibit similar gene regulatory functions in single cells in response to 60-min inhibitor inputs.** (A) (i) A scatter plot showing the relationship of the slow kinetics promoter  $P_{SIP18}$  reporter expression with Msn2 and Msn4 activation at the single cell level. To cover the full dynamic range of TF translocation, the data from the experiments using 60 min inhibitor pulses with 0.1, 0.25, 0.5, 0.75 and 1  $\mu$ M doses have been combined (n: 702 cells). (ii) Single-cell scatter plots showing the relationships between  $P_{SIP18}$  reporter expression with (left) Msn2 or (right) Msn4 nuclear level, respectively. Single-cell data are from (i). (B) Plots show the relationships between  $P_{SIP18}$  reporter expression and (left) Msn2 or (right) Msn4, respectively. Single cells are binned based on their Msn2 or Msn4 nuclear level as indicated in the x-axis and the average of reporter expression is calculated for each binned groups of single cells and shown in the bar graphs.
