# Supplementary material for: Dynamic control of gene regulatory logic by seemingly redundant transcription factors
Source: eLife journal article supplement (doi:10.7554/elife.18458), 2016-09-30
Supplement: supp [file elife-18458-supp-v1.zip › elife_poa_e18458_Figure_3_figure_supplement_5.pdf]

## A inhibitor inputs

(i)  $P_{DCS2}$  reporter expression  
(fast kinetics promoter)

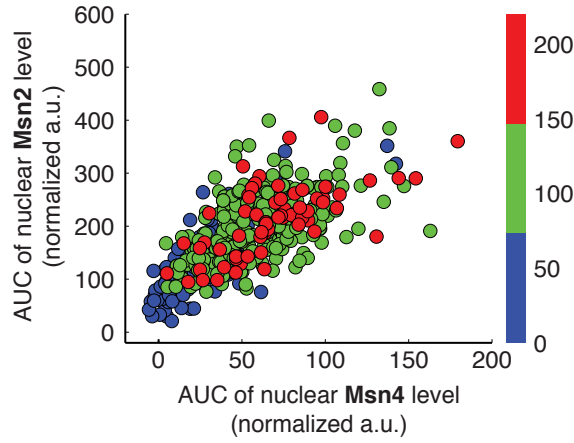

(ii)

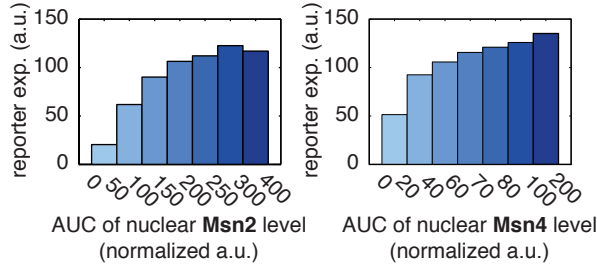

## B inhibitor inputs

(i)  $P_{SIP18}$  reporter expression  
(slow kinetics promoter)

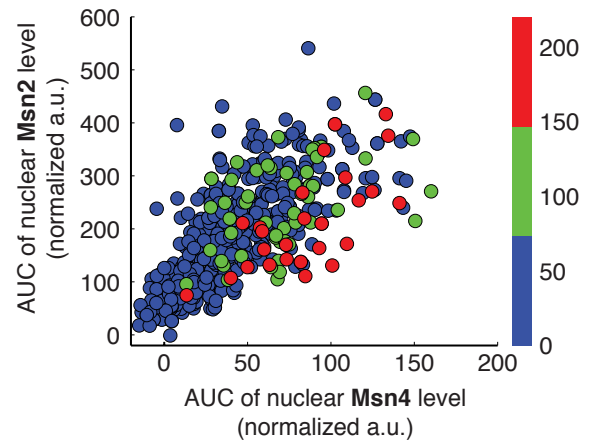

(ii)

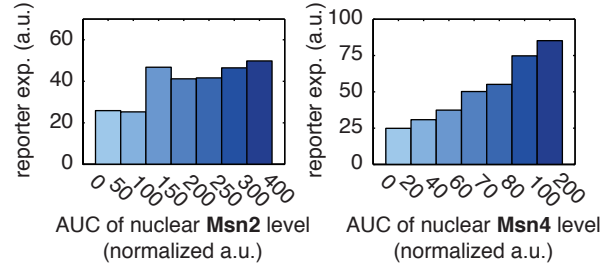

**Figure 3 - figure supplement 5. Relationship between reporter gene expression and the area-under-the-curve (AUC) of nuclear TF levels in response to 30-min inhibitor inputs.** Single-cell data from Figure 3 were analyzed to show the relationship of (A) the fast kinetics promoter  $P_{DCS2}$  or (B) the slow kinetics promoter  $P_{SIP18}$  reporter expression with the AUC of Msn2 and Msn4 nuclear translocation. The AUC is calculated as the sum of TF nuclear levels for each single-cell time trace (data points taken every two minutes). (i) Scatter plots showing single-cell distributions; (ii) Bar graphs showing average level of gene expression in single cells binned based on their TF AUCs.
