# Supplementary material for: Dynamic control of gene regulatory logic by seemingly redundant transcription factors
Source: eLife journal article supplement (doi:10.7554/elife.18458), 2016-09-30
Supplement: supp [file elife-18458-supp-v1.zip › elife_poa_e18458_Figure_3_figure_supplement_6.pdf]

## A inhibitor inputs - $P_{DCS2}$ reporter expression (fast kinetics promoter)

### (i) speed of nuclear import

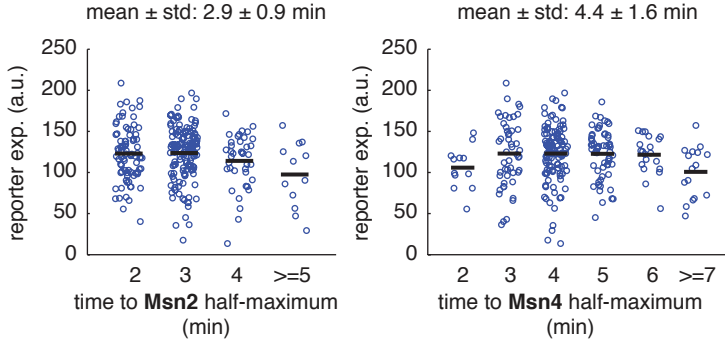

### (ii) speed of nuclear export

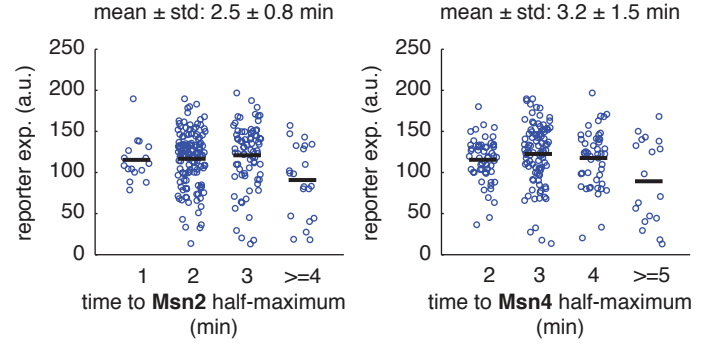

## B inhibitor inputs - $P_{SIP18}$ reporter expression (slow kinetics promoter)

### (i) speed of nuclear import

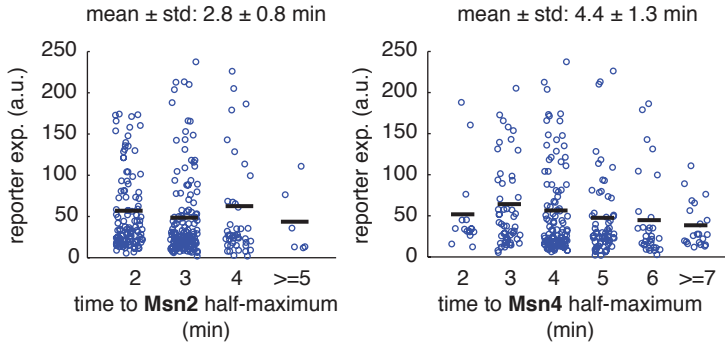

### (ii) speed of nuclear export

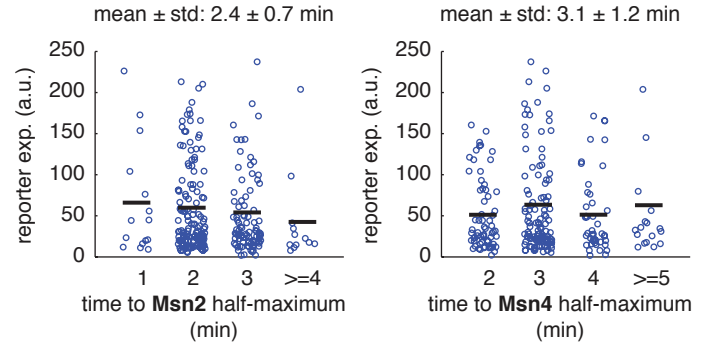

**Figure 3 – figure supplement 6. Single-cell distributions of reporter gene expression versus the speed of TF nuclear import or export.** (A) Scatter plots showing single-cell distributions of  $P_{DCS2}$  reporter expression versus (i) the speed of nuclear import or (ii) the speed of nuclear export of Msn2 and Msn4. The speed of nuclear translocation is quantified by the time needed to reach half maximum of nuclear translocation of Msn2 or Msn4 in response to stimulation (nuclear import speed) or upon the removal of stimulation (nuclear export speed). Single-cell data are from Figure 3A. The means of reporter expression are calculated for grouped single cells and shown using black solid lines. The mean and standard deviation of nuclear translocation times in single cells are calculated and shown above each plot. (B) Scatter plots showing single-cell distributions of  $P_{SIP18}$  reporter expression versus (i) the speed of nuclear import or (ii) the speed of nuclear export of Msn2 and Msn4. Single-cell data are from Figure 3B.
