# Supplementary material for: Dynamic control of gene regulatory logic by seemingly redundant transcription factors
Source: eLife journal article supplement (doi:10.7554/elife.18458), 2016-09-30
Supplement: supp [file elife-18458-supp-v1.zip › elife_poa_e18458_Figure_4_figure_supplement_2.pdf]

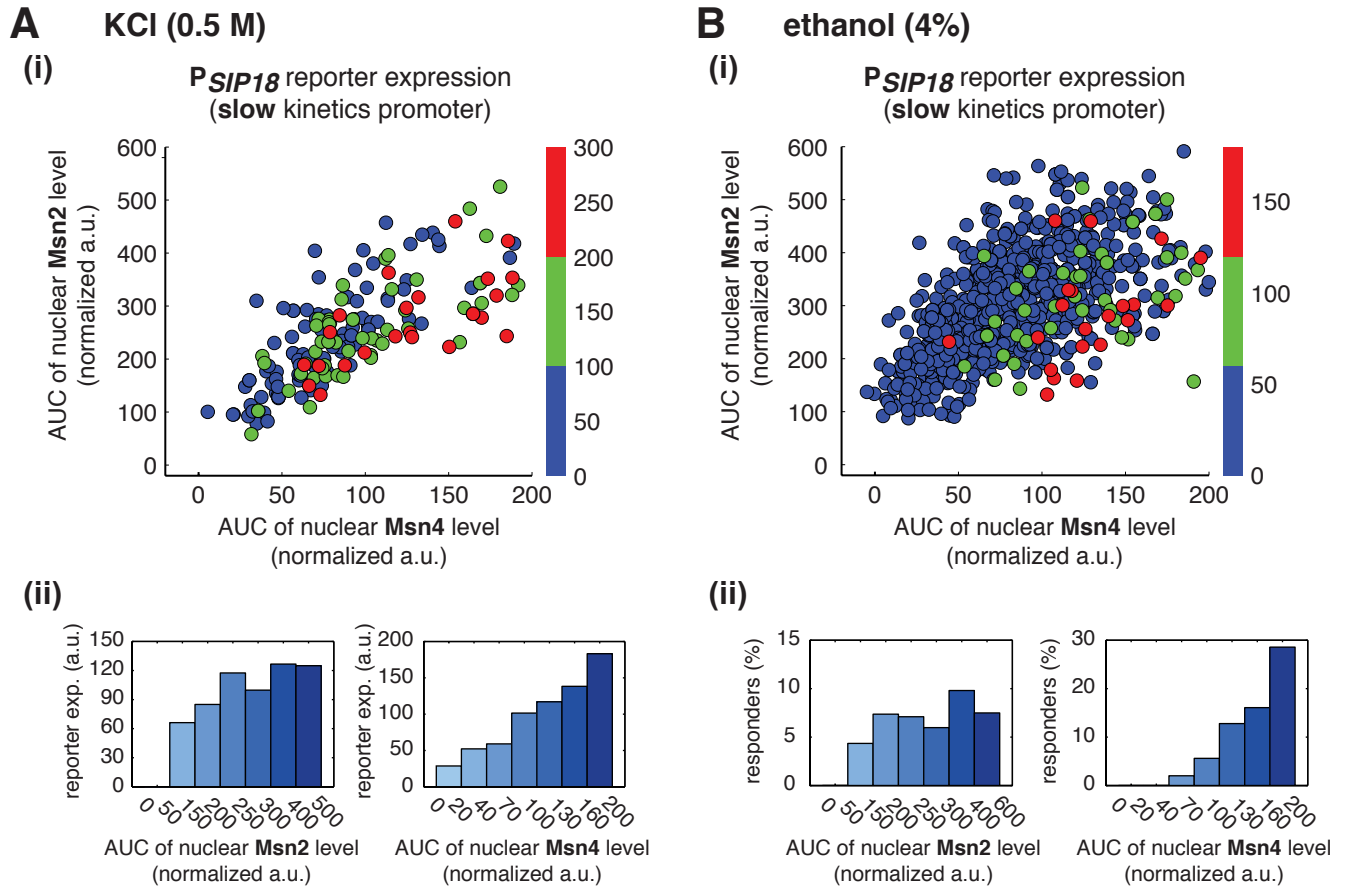

**Figure 4 - figure supplement 2. Relationship between reporter gene expression and the area-under-the-curve (AUC) of nuclear TF levels in response to natural stresses.** Single-cell data in Figure 4 were analyzed show the relationship of the slow kinetics promoter  $P_{SIP18}$  reporter expression with the AUC of Msn2 and Msn4 nuclear translocation in response to (A) 0.5 M KCl and (B) 4% ethanol. For the ethanol treatment, the AUC is calculated as the sum of TF nuclear levels for the first 30 minutes of stress treatment for each single-cell time trace (data points taken every two minutes). Due to the translational arrest induced by ethanol stress, TF nuclear localization at the later time points would not be able to contribute significantly to gene expression.
