# Supplementary material for: Dynamic control of gene regulatory logic by seemingly redundant transcription factors
Source: eLife journal article supplement (doi:10.7554/elife.18458), 2016-09-30
Supplement: supp [file elife-18458-supp-v1.zip › elife_poa_e18458_Figure_6_figure_supplement_1.pdf]

**A****Target genes with fast kinetics promoters**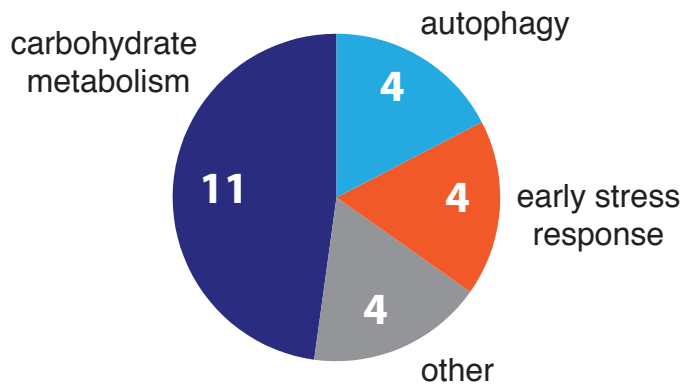**carbohydrate metabolism (11)**

*PGM2, HXK1, GPH1, GSY2, GSY1, YFR017C, GLC3, TSL1, NTH1, YER067W, CYB2*

**autophagy (4)**

*YLR312C, YOL083W, PRC1, CVT19*

**early transcriptional response during stresses (4)**

*XBP1, YPL230W, DDR2, EMI2*

**other (4)**

energy metabolism: *CYC7*  
 mitochondrial protein import: *YBR230C*  
 mRNA processing: *DCS2*  
 oxidative stress resistance: *GPX1*

**unknown (6)**

*YNR014W, YPL247C, YHL021C, YNR034W-A, YLR149C, YLR327C*

**B****Target genes with slow kinetics promoters**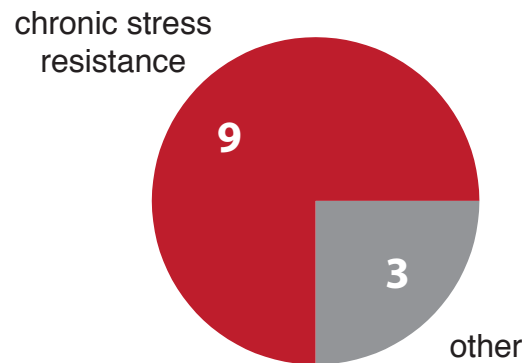**chronic stress resistance (9)**

oxidative stress resistance: *GAD1, SIP18, GRX1, GND2, TKL2*

ethanol stress resistance: *ALD3*

heat stress resistance: *HSP26*

long-term starvation/stationary phase: *YGP1*

long-term starvation/sporulation: *SHC1*

**other (3)**

carbohydrate metabolism: *ARA1*  
 energy metabolism: *YKL151C*  
 Ras/cAMP/PKA signaling: *TFS1*

**unknown (2)**

*YMR196W, YGR043C*

**Figure 6 - figure supplement 1. Biological functions of target genes with fast or slow kinetics promoters.** Pie charts are used to illustrate the functional enrichments for target genes with (A) fast and (B) slow kinetics promoters. Detailed functional classification for each gene in the two gene groups are shown below the pie charts. Only genes with known functions are included in the pie charts. “Early stress response” includes the genes that are important for early transcriptional response during stresses. The groups of target genes are from Hao and O’Shea, 2012.
